# Supplementary material
Source: PubMed Central journal article supplement (PMC7567943)
Supplement: mmc1.pdf [file mmc1.pdf]

**iScience, Volume 23**

**Supplemental Information**

**Equid Herpesvirus-1 Exploits  
the Extracellular Matrix of Mononuclear Cells  
to Ensure Transport to Target Cells**

**Mohamed Kamel, Selvaraj Pavulraj, Beatrix Fauler, Thorsten Mielke, and Walid Azab**

- 1 **Supplemental Information**
- 2
- 3 **Supplemental figures and legends**
- 4

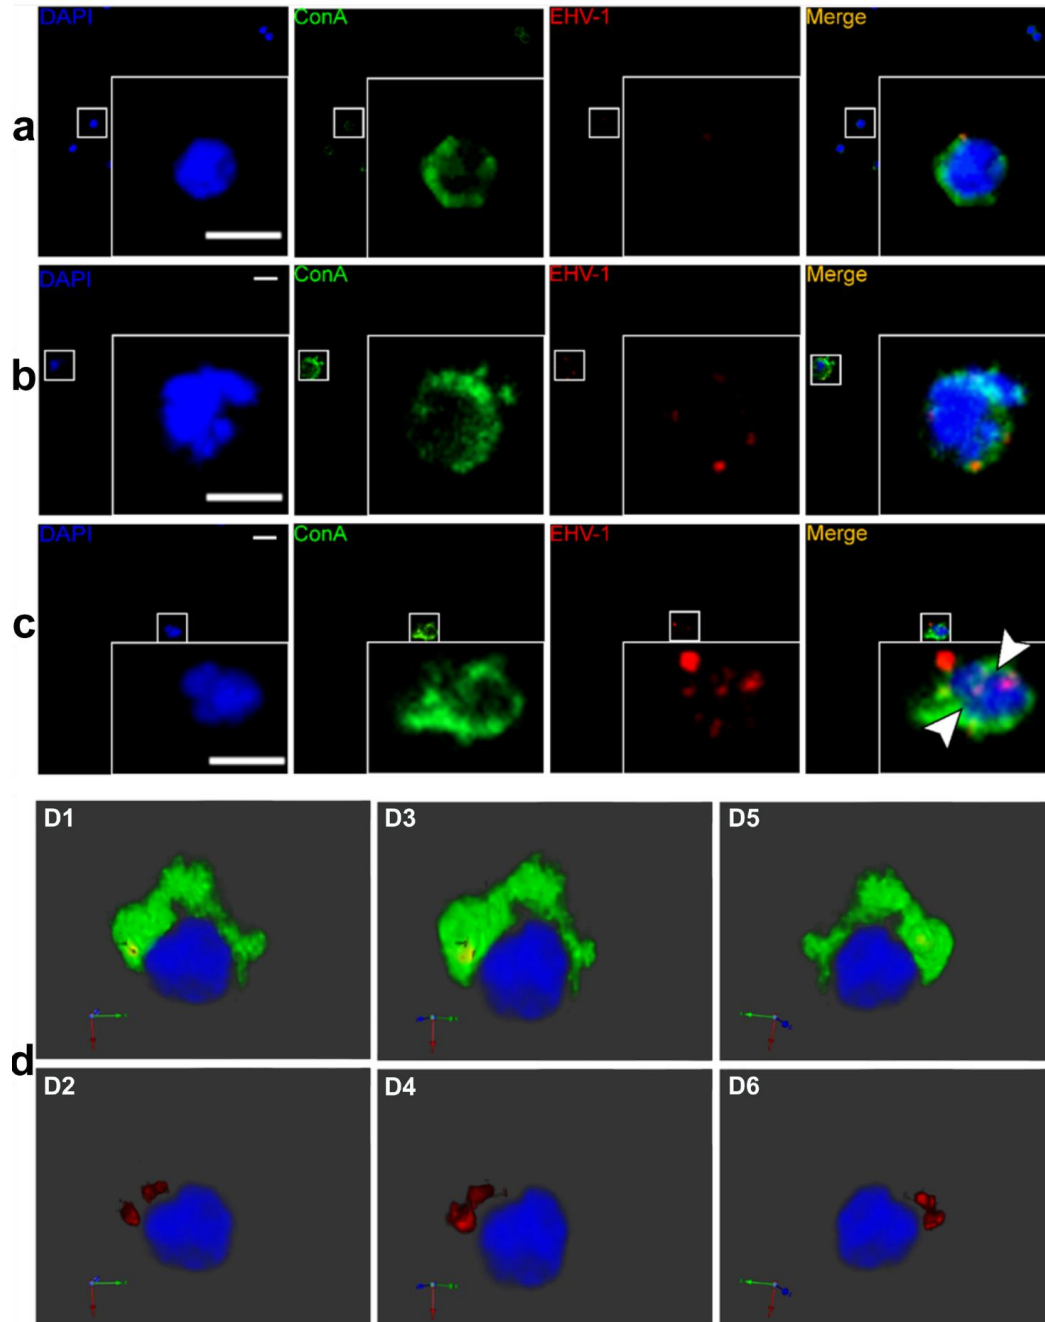

5  
6 Figure S1. Colocalization of virus particles with the carbohydrate-rich extracellular matrix, Related to  
7 Figure 1. PBMC were infected with EHV-1<sup>RFP</sup> (red; MOI=0.5) for 1 hr (a) and 24 hr (b and c). Cell surface  
8 glycoproteins of the ECM were stained green with FITC-labeled ConA. PBMC nucleus was stained with  
9 DAPI (blue). After 24 hr, EHV<sup>RFP</sup> viral particles were detected outside the cells colocalizing with ECM (b)  
10 as well as inside the PBMC (c, arrowheads). Data are representatives of three independent experiments.  
11 Scale bar = 10  $\mu$ m and scale bar of magnification = 7  $\mu$ m. Image stacks (number of stacks = 17 with  
12 0.75  $\mu$ m z-stack step size) were photographed using VisiScope Confocal FRAP microscope. Presented  
13 here is a single optical section of the stacks. (d) 3D overview of embedded viruses in the ECM. Red:  
14 RFP-labeled virus particles; green: FITC-labeled ConA. (D1 and D2) are the front overviews, (D3 and D4)  
15 are the side overviews and (D5 and D6) are the back overviews. The 3D images were reconstituted from  
16 total projection of stack series image planes (number of stacks = 17) with 0.75  $\mu$ m z-stack step size.

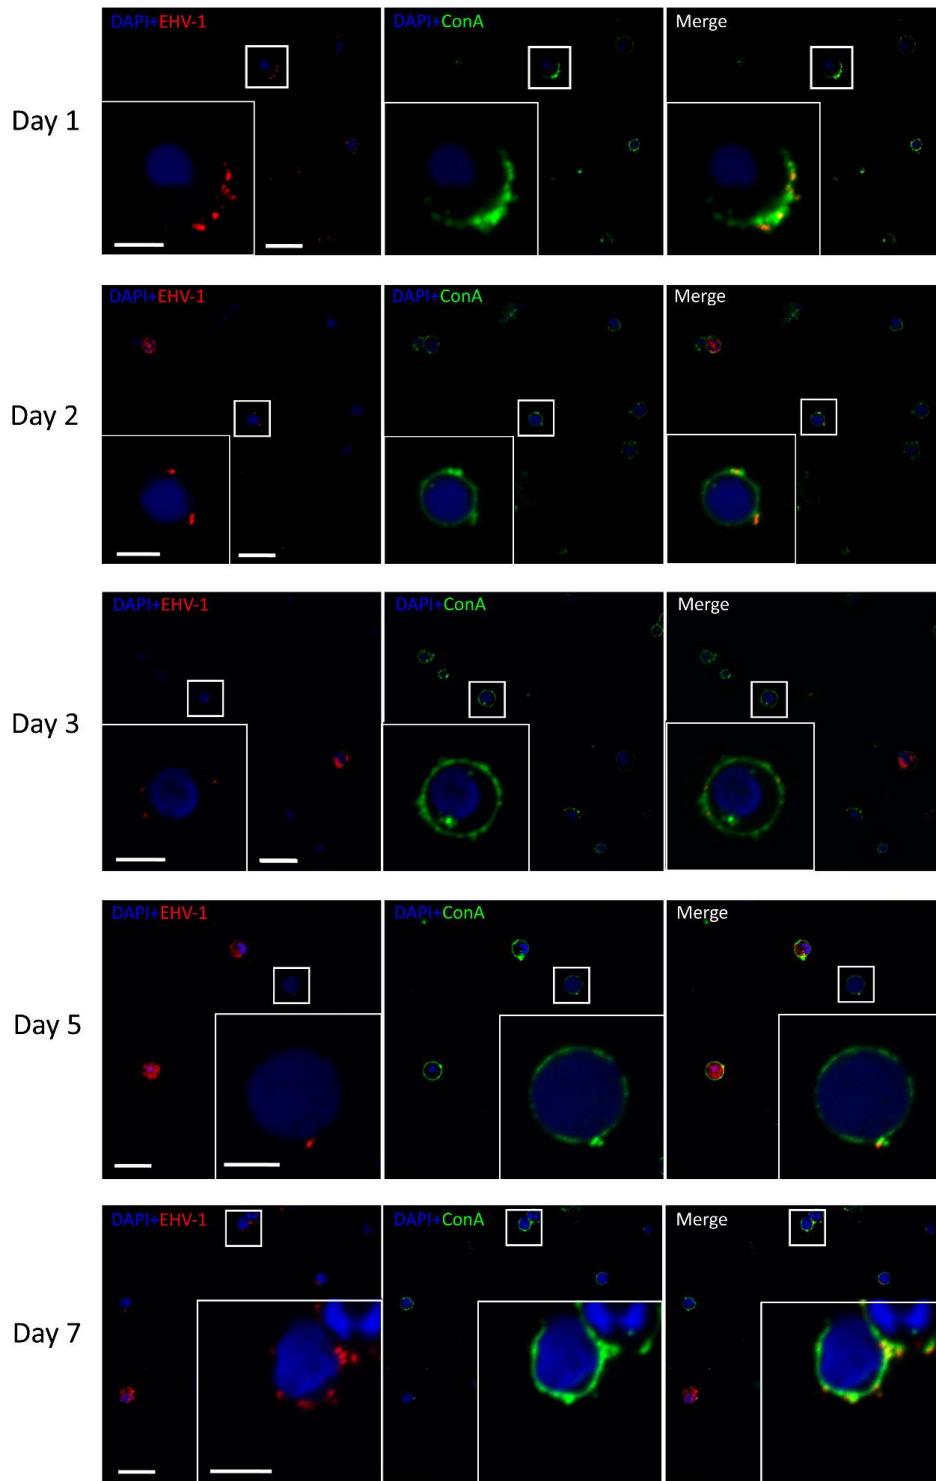

17  
18  
19  
20  
21  
22  
23  
24

**Figure S2. Colocalization of virus particles with the carbohydrate-rich extracellular matrix after 7 days of infection, Related to Figure 1.** PBMC were infected with EHV-1<sup>RFP</sup> (red; MOI=0.5) for 24 hr and up to 7 days. At different time points (day 1, 2, 3, 5 and 7) PBMC surface glycoproteins of the ECM were stained green with FITC-labelled ConA. Nucleus was stained with DAPI (blue). Data are representatives of three independent experiments. Scale bar = 30  $\mu$ m and scale bar of the magnification = 5  $\mu$ m. Image stacks (number of stacks = 15 with 0.5  $\mu$ m z-stack step size) were photographed using VisiScope Confocal FRAP microscope. Presented here is a single optical section of the stacks.

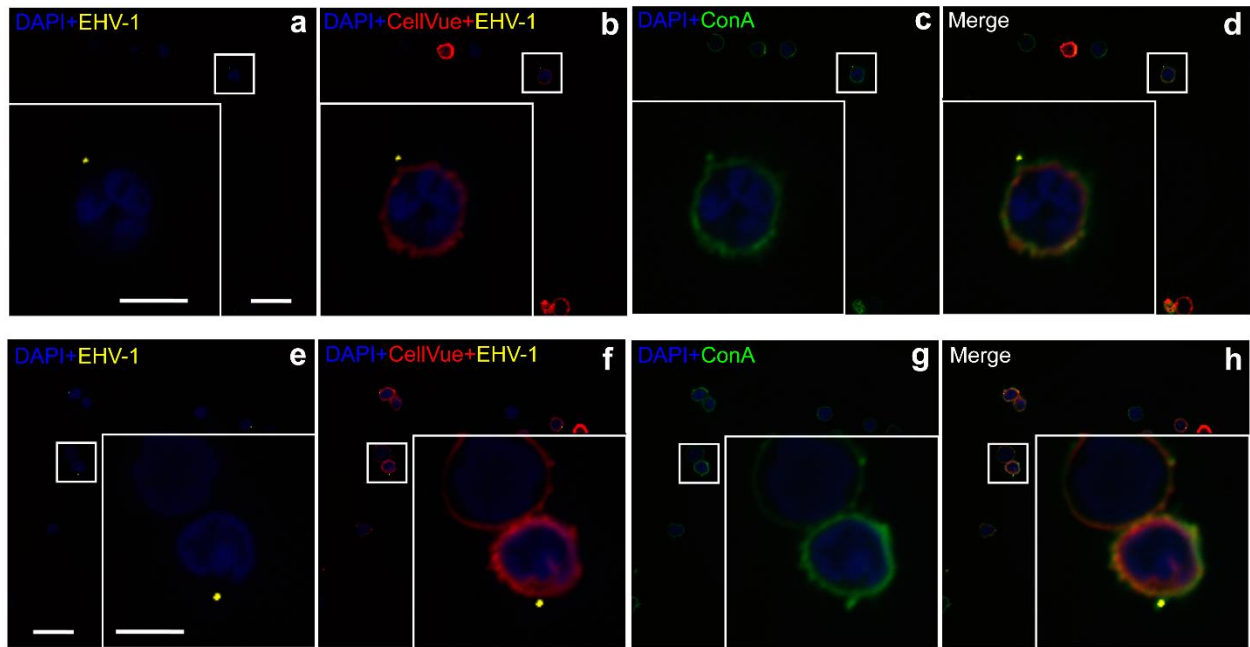

25

26 **Figure S3. Colocalization of virus particles with the carbohydrate-rich extracellular matrix, Related**  
 27 **to Figure 1.** PBMC were infected with EHV-1<sup>RFP</sup> (MOI=0.5) for 5 min. Cell surface glycoproteins of the  
 28 ECM were stained green with FITC-labelled ConA. Plasma membrane was stained with CellVue® Claret  
 29 Far Red Fluorescent dye (red) and nucleus was stained with DAPI (blue). Two independent  
 30 representative experiments are shown (**a-d** and **e-f**). EHV-1<sup>RFP</sup> viral particles (yellow) were detected  
 31 outside cells colocalizing with ECM (**c** and **g**), but not with plasma membrane (**b** and **f**). Scale bar = 30  
 32  $\mu\text{m}$  and scale bar of the magnification = 5  $\mu\text{m}$ . Image stacks (number of stacks = 15 with 0.5  $\mu\text{m}$  z-stack  
 33 step size) were photographed using VisiScope Confocal FRAP microscope. Presented here is a single  
 34 optical section of the stacks.

35

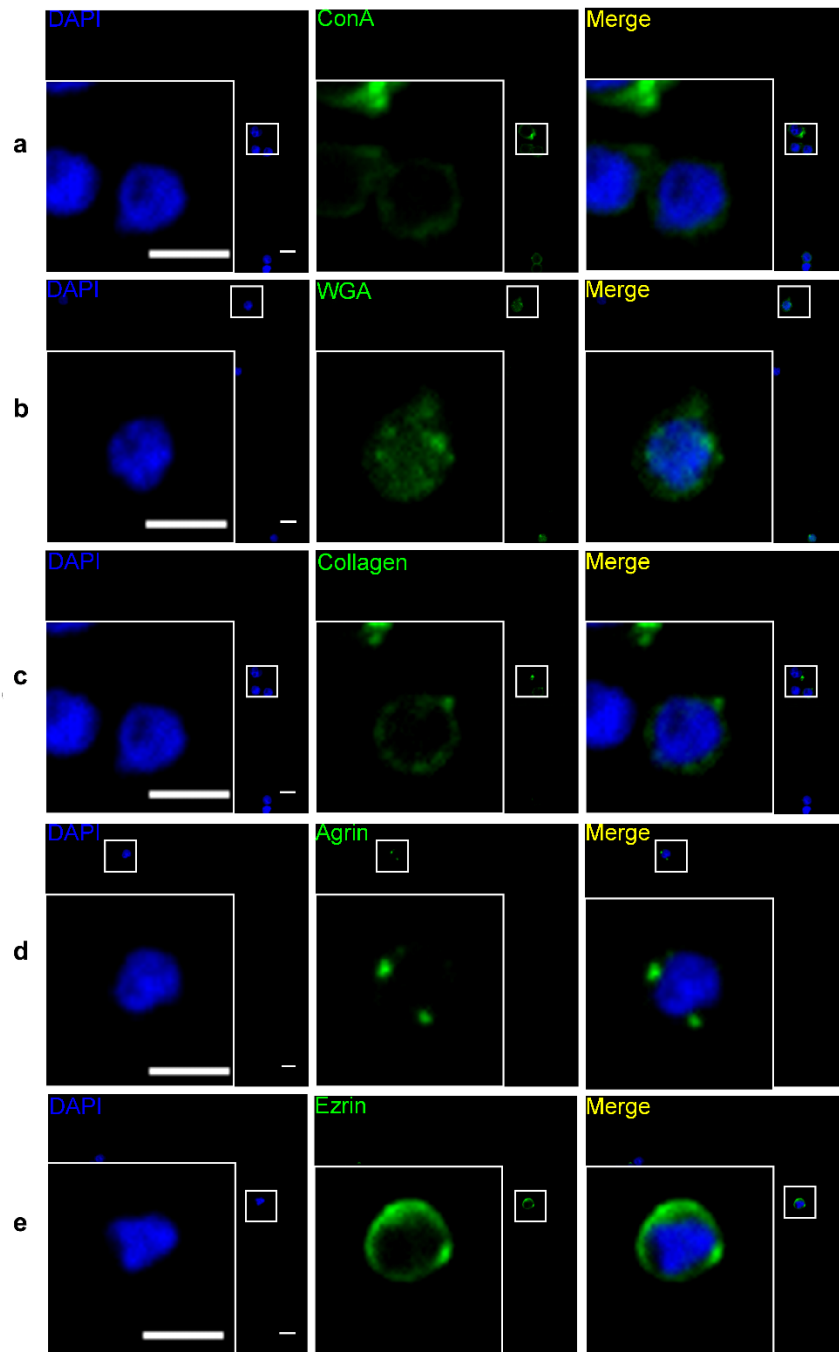

36

37 **Figure S4. Extracellular matrix components of non-infected PBMC, Related to Figure 1.** Cell surface  
 38 glycoproteins of the non-infected PBMC stained green with FITC-labeled ConA (a), lectin from *Triticum*  
 39 *vulgaris* (WGA; b), anti-collagen (c), anti-agrin (d), or anti-ezrin (e). PBMC nucleus was stained with DAPI  
 40 (blue). Data are representatives of three independent experiments. Scale bar = 10  $\mu$ m and scale bar of  
 41 magnification = 7  $\mu$ m. Image stacks (number of stacks = 17 with 0.75  $\mu$ m z-stack step size) were  
 42 photographed using VisiScope Confocal FRAP microscope. Presented here is a single optical section of  
 43 the stacks.

44

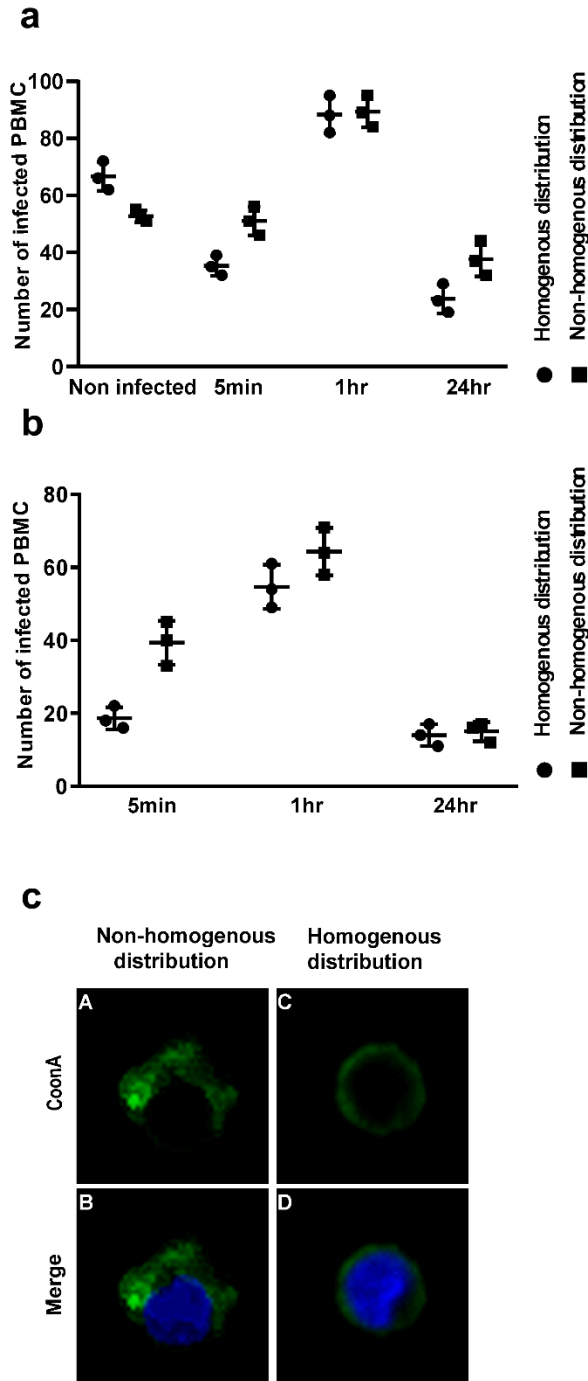

45

46 **Figure S5. Modulation of ECM on the surface of infected and non-infected PBMC, Related to**  
 47 **Figure 1.** PBMC were either mock-infected or infected with EHV-1<sup>RFP</sup> (MOI=0.5) for 5 min, 1 hr, or 24 hr.  
 48 The cells were stained green with FITC-labeled ConA (a) or lectin from *Triticum vulgare* (WGA; b). The  
 49 experiment was performed three independent times in blinded fashion. The y-axis indicates the total  
 50 number of cells involved in the assay. Kruskal–Wallis with Dunns test was used to compare modulation of  
 51 ECM on infected cells at different time points to the non-infected cells; no significant difference was  
 52 detected. (c) Confocal images showing non-homogenous (A and B) and homogenous (C and D)  
 53 distribution of ECM stained with ConA (green). Nucleus was stained with DAPI (blue). Image stacks  
 54 (number of stacks = 17 with 0.75  $\mu$ m z-stack step size) were photographed using VisiScope Confocal  
 55 FRAP microscope. Presented here is a single optical section of the stacks.

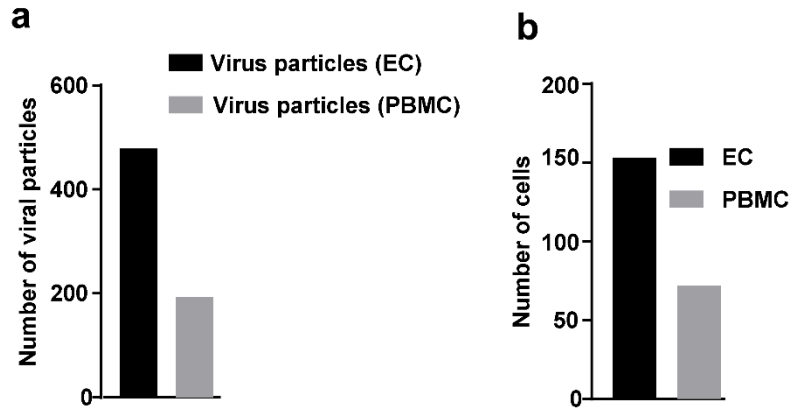

56

57 **Figure S6. Virus transmission from infected PBMC to EC, Related to Figure 2.** Number of counted  
 58 viral particles embedded in the ECM of PBMC and transferred to EC is shown. PBMC were infected with  
 59 EHV-1<sup>RFP</sup> (MOI=0.5) for 5 min and added to endothelial cells for 2 hr followed by fixation with PFA 4%  
 60 and image stacks (number of stacks = 17 with 0.75  $\mu\text{m}$  z-stack step size) were photographed using  
 61 VisiScope Confocal FRAP microscope. (a) Number of counted viral particles on the surface of PBMC and  
 62 EC. (b) Number of PBMC and EC on which virus particles were present. The experiment was conducted  
 63 one time in triplicate.

64

65



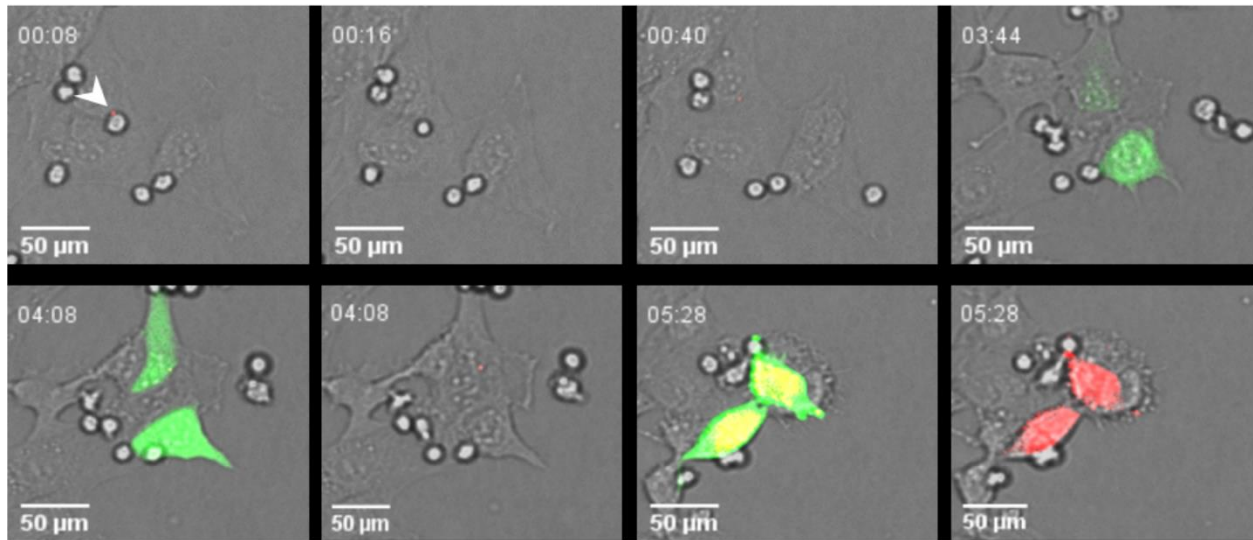

66  
67

68 **Figure S7. Live cell imaging of virus transmission from infected PBMC to endothelial cells,**  
 69 **Related to Figure 2.** Time-lapse live cell imaging confocal microscopy showing EHV-1<sup>RFP+GFP</sup> viral  
 70 particles transfer from the overlaid 5-min-infected-PBMC on endothelial cells. Viral particles (red,  
 71 arrowhead) were visualized moving from infected PBMC to endothelial cells. Virus replication in EC is  
 72 indicated by GFP expression, which is integrated in the viral genome (green) and production of new  
 73 progenies RFP-labeled virus (red) in the infected cells. At time points 04:08 and 05:28 min, the green  
 74 pseudocolor was removed to clearly expose virus-RFP signals. Image stacks (number of stacks = 15 with  
 75 0.5 μm z-stack step size) were photographed using VisiScope Confocal FRAP microscope. Presented  
 76 here is a single optical section of the stacks.

77

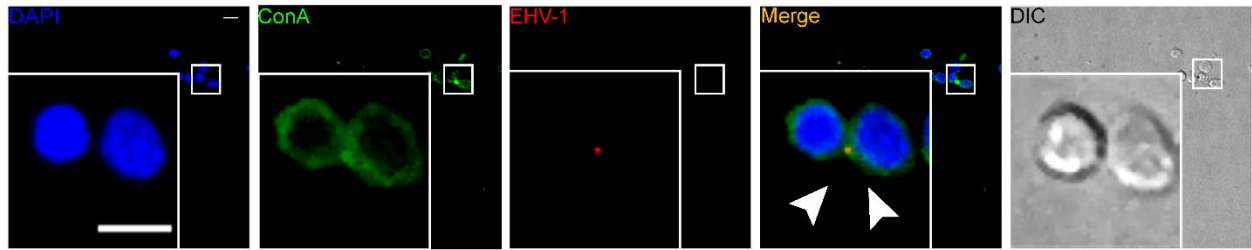

78  
79

80 **Figure S8. EHV-1 transfer between PBMC, Related to Figure 2.** PBMC infected with EHV-1<sup>RFP</sup> (red;  
81 MOI=0.5) for 1 hr and stained with ConA (green) display aggregates of two PBMC with the likelihood of  
82 virus transfer in between. Data are representatives of three independent experiments. Scale bar = 10  $\mu\text{m}$   
83 and scale bar of magnification = 7  $\mu\text{m}$ . Image stacks (number of stacks = 17 with 0.75  $\mu\text{m}$  z-stack step  
84 size) were photographed using VisiScope Confocal FRAP microscope. Presented here is a single optical  
85 section of the stacks.  
86

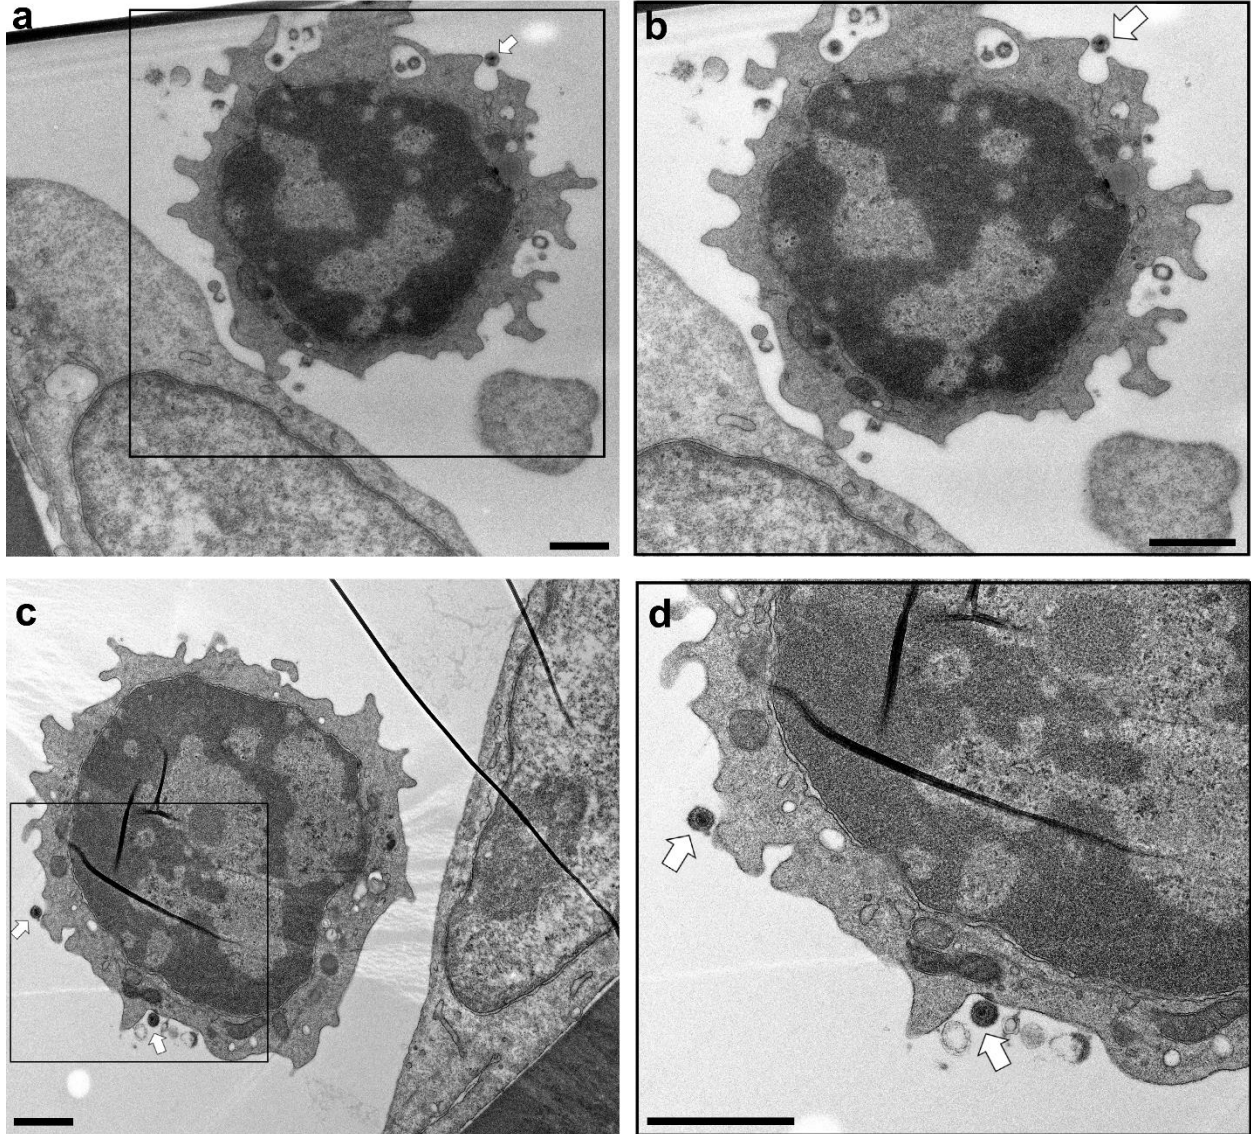

87  
88  
89  
90  
91  
92  
93  
94  
95

**Figure S9. Virus particles on the surface of infected-PBMC, Related to Figure 3.** Transmission electron microscopy (TEM) of EC grown on gridded coverslips and overlaid with EHV-1<sup>RFP</sup> infected-PBMCs. Infected cells were observed either interacting with (a and b) or in close proximity (c and d) to EC. TEM images of the targeted PBMC show virus particles (white arrows) on the surface of infected PBMC. Marked parts with rectangles in (a and c) are magnified in (b and d, respectively). Scale bar = 1 μm.

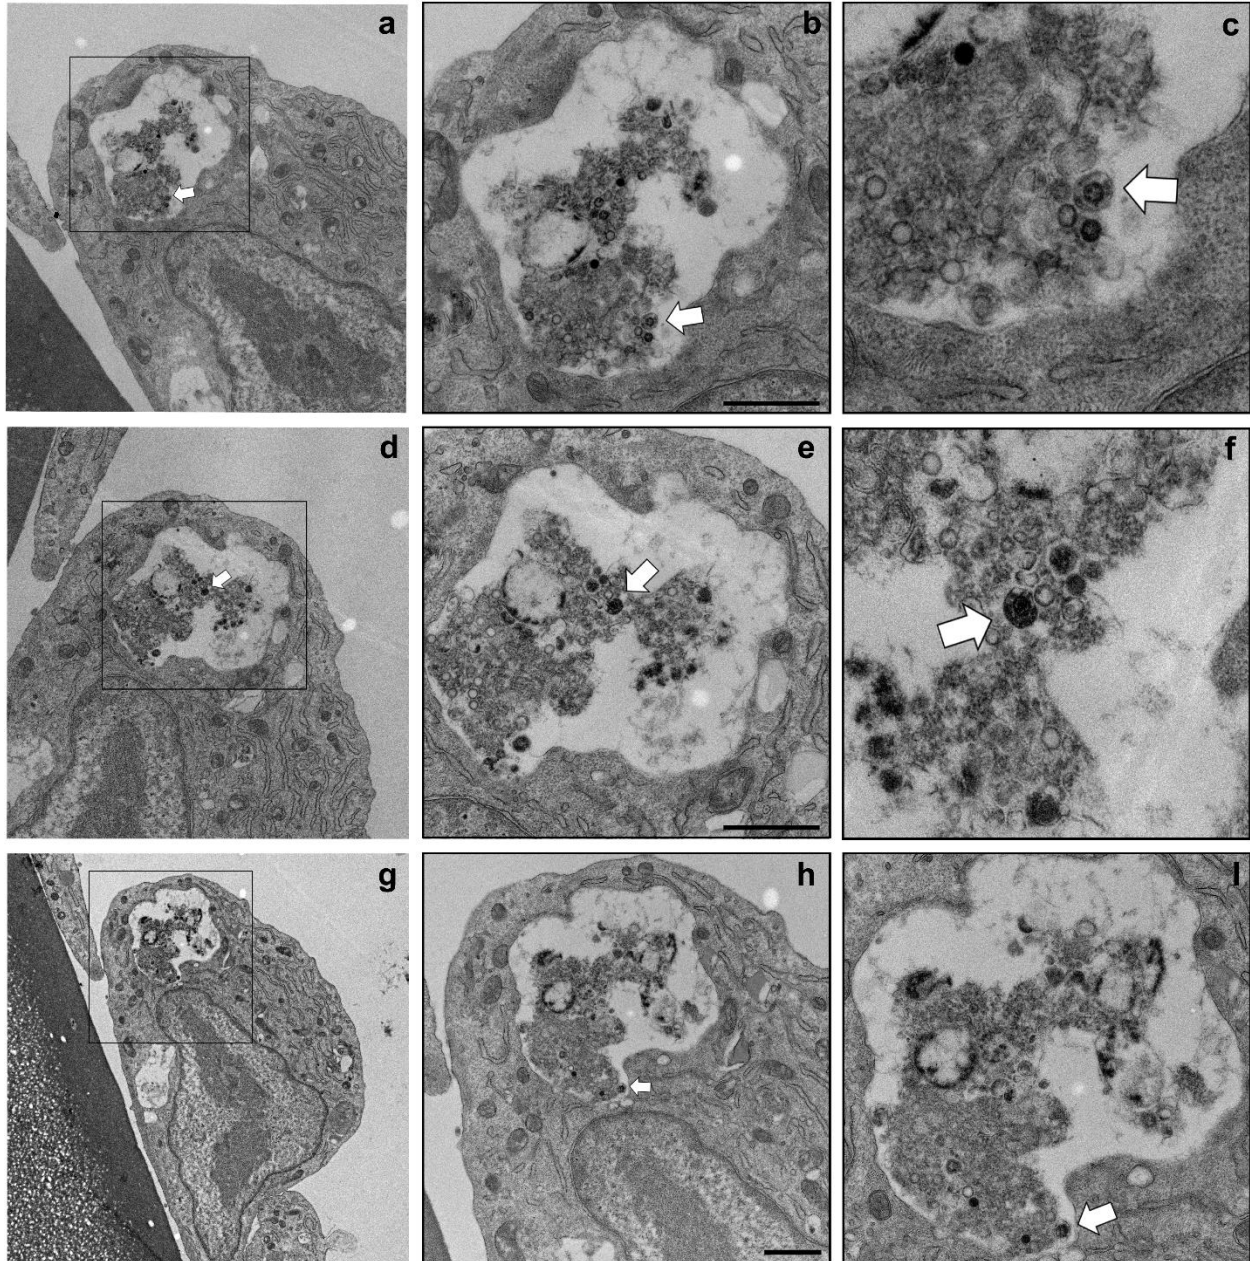

96  
 97  
 98  
 99  
 100  
 101  
 102  
 103

**Figure S10. Transcellular migration of infected-PBMC through endothelial cells, Related to Figure 5.** Ultrathin cross sections of PBMC crossing endothelial cells. PBMC were infected for 5 min with EHV-1<sup>RFP</sup> and incubated over adherent EC for 3 hr. Partially digested infected-PBMC (at different stacks) is shown (**a, d, g**) and marked with a rectangle, which is magnified (**b-c, e-f, h-i**). Virus particles attached to migrating PBMC is marked with white arrows. Scale bar =1  $\mu$ m.

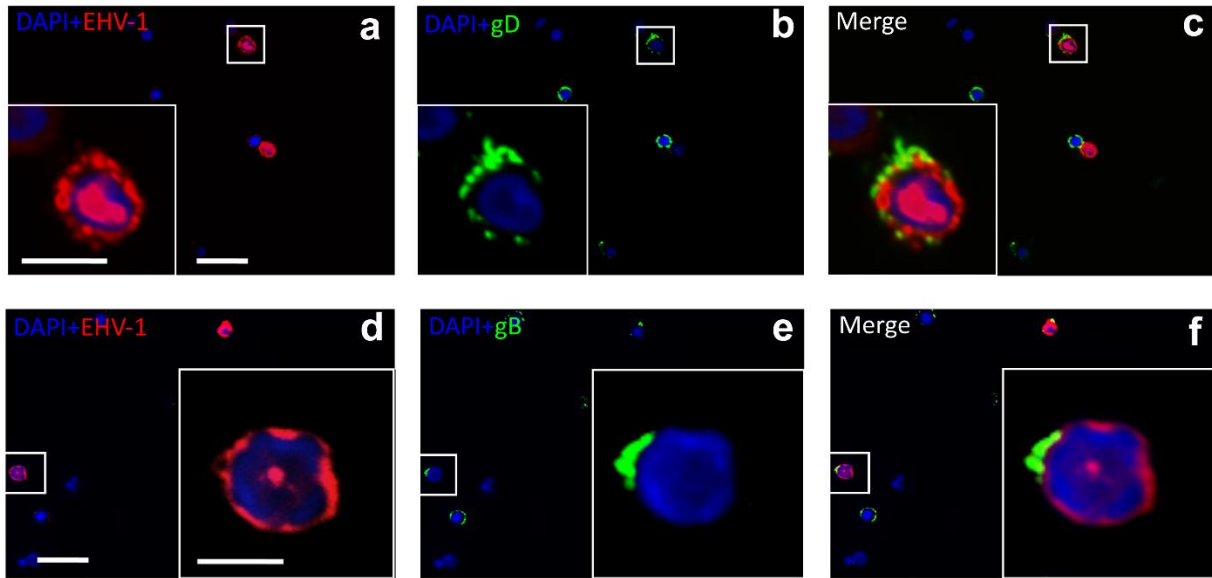

104

105 **Figure S11. Expression of viral envelope glycoproteins (gD and gB) on the surface of infected**  
 106 **PBMC, Related to Figure 6.** PBMC were infected with EHV-1<sup>RFP</sup> (red; MOI=0.5) for 24 hr and probed  
 107 with antibody against EHV-1 gD (a-c) or gB (d-f) followed by anti-mouse Alexa Fluor-488 (green).  
 108 Nucleus was stained with DAPI (blue). Red signals on cell surface and within the cytoplasm or the  
 109 nucleus of the infected PBMC indicates RFP-labelled virus particles and expression of viral capsid  
 110 proteins. Data are representatives of three independent experiments. Scale bar = 30  $\mu\text{m}$  and scale bar of  
 111 the magnification = 5  $\mu\text{m}$ . Image stacks (number of stacks = 15 with 0.5  $\mu\text{m}$  z-stack step size) were  
 112 photographed using VisiScope Confocal FRAP microscope. Presented here is a single optical section of  
 113 the stacks.

114

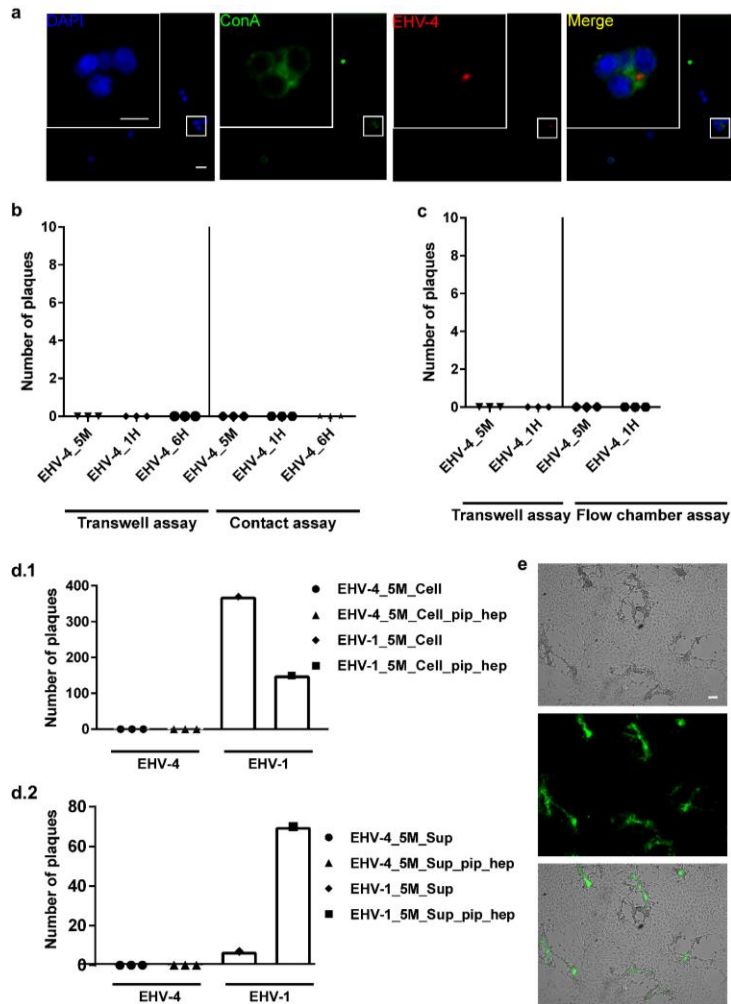

115  
 116 **Figure S12. Colocalization of EHV-4 with the carbohydrate-rich extracellular matrix, Related to**  
 117 **Figure 7. (a)** PBMC were infected with EHV-4<sup>GFP</sup> (MOI=0.5) for 5 min. Cell surface glycoproteins of the  
 118 ECM were stained with FITC-Labeled ConA (green). EHV-4 particles were stained with anti-glycoprotein  
 119 D monoclonal antibodies (red). PBMC nucleus was stained with DAPI (blue). Data are representatives of  
 120 three independent experiments. Scale bar = 10  $\mu$ m and scale bar of magnification = 7  $\mu$ m. Image stacks  
 121 (number of stacks = 17 with 0.75  $\mu$ m z-stack step size) were photographed using VisiScope Confocal  
 122 FRAP microscope. Presented here is a single optical section of the stacks. **(b and c)** EHV-4 transmission  
 123 from infected PBMC to EC under “static” and “dynamic” states. PBMC were infected with EHV-4<sup>GFP</sup> for 5  
 124 min. Infected PBMC were added to EC under “static” conditions **(b)** or allowed to flow over EC “dynamic”  
 125 **(c)** in the presence of neutralizing antibodies. After 24 hr, virus spread was assessed by counting the  
 126 plaques on EC. As a control, infected PBMC were placed into a transwell insert without direct contact  
 127 between EC and PBMC “no contact”. The data represent the mean  $\pm$  standard deviation of three  
 128 independent and blinded experiments. **(d)** PBMC were infected with EHV-4<sup>GFP</sup> (MOI=0.1) for 5 min. The  
 129 ECM was disrupted with both mechanical (extensive pipetting) and chemical (heparin treatment) together  
 130 (EHV-4\_5M\_Cell\_pip\_hep). The disrupted cells **(d.1)** or the supernatant (EHV-4\_5M\_Sup\_pip\_hep; **d.2**)  
 131 were added to EC. As a control, the ECM was left undisrupted (EHV-4\_5M\_Cell or EHV-4\_5M\_Sup). As  
 132 a control of pipetting and heparin treatment, EHV-1 was used. The data represent the mean  $\pm$  standard  
 133 deviation of three independent and blinded experiments with EHV-4. Cells were infected with EHV-1 once  
 134 to confirm virus spread and infection (see Fig 4a and b). **(e)** Endothelial cells are permissive for EHV-4  
 135 cell-free viruses. EC were infected with EHV-4<sup>GFP</sup> (MOI 0.1) for 1 hr. Virus and media were removed and  
 136 the cells were overlaid with methylcellulose media 1.5% for 3 days. EHV-4 GFP-expressing viral plaques  
 137 were imaged with Carl Zeiss AXIO imager microscope equipped with a Zeiss Axiocam. Scale bar = 70  
 138  $\mu$ m.

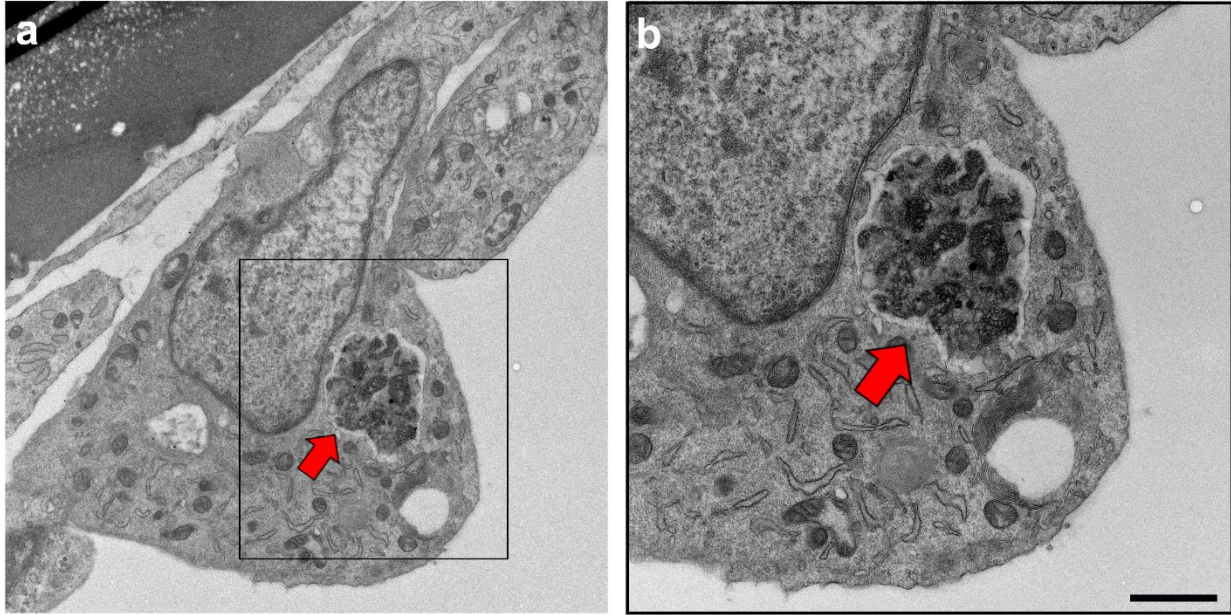

140

141 **Figure S13. Transcellular migration of PBMC through endothelial cells, Related to Figure 5.**

142 Ultrathin cross section of non-infected PBMC crossing endothelial cells. Partially digested naïve PBMC is  
143 shown within a cytoplasmic vacuole of EC. The migrating PBMC marked with a rectangle in (a, red arrow)  
144 is magnified in (b, red arrow). Scale bar = 1  $\mu$ m.

145

## 146 **Transparent Methods**

### 147 **Methods**

148 **Viruses.** All viruses used in this study were produced and recovered from infectious bacterial artificial  
149 chromosome (BAC) clones. Those were BACs of EHV-1 (EHV-1<sup>GFP</sup>) strain Ab4 (Goodman et al., 2007),  
150 EHV-4 (EHV-4<sup>GFP</sup>) strain TH20p (Azab et al., 2009), recombinant EHV-1\_gB4 and EHV-4\_gB  
151 (Spiesschaert et al., 2015b), and EHV-1\_gD4 and EHV-4\_gD1 (Azab and Osterrieder, 2012). Viruses  
152 were grown on equine dermal (ED) cells (CCLV-RIE 1222, Federal Research Institute for Animal health,  
153 Germany) (Spiesschaert et al., 2015b). All recombinant viruses express the enhanced green fluorescent  
154 protein (EGFP; encoded in the mini-F sequence under the control of the immediate-early CMV promoter)  
155 for efficient identification of infected cells. All virus stocks were prepared by infecting ED cells until having  
156 100 % cytopathic effect (CPE). Infected cultures (supernatant and cells) were collected and centrifuged at  
157 6000 x g for 5 min to get rid of cellular debris. Virus-rich supernatants were collected and stored at -80 °C.

158 **mRFP1-labeled viruses.** Insertion of monomeric red fluorescent protein (mRFP1) into VP26 of EHV-1  
159 Ab4 strain was performed as described before (Azab et al., 2013b; Tischer et al., 2006). Briefly, mRFP1  
160 was amplified by PCR using pEPmRFP1-in (Tischer et al., 2006) as a template; all used primers are  
161 referenced in (Azab et al., 2013b). The resulting PCR products were electroporated into GS1783 (a kind  
162 gift from Dr. Greg Smith, Northwestern University, Chicago, IL) harboring the corresponding BACs (EHV-  
163 1 with and without GFP; to give rise of EHV-1<sup>RFP+GFP</sup> and EHV-1<sup>RFP</sup>, respectively). Kanamycin-resistant  
164 colonies were purified and screened by PCR and restriction fragment length polymorphism (RFLP)  
165 analyses using EcoRV and BamHI. Positive clones were subjected to a second round of Red  
166 recombination to obtain the final constructs after excision of kanamycin gene. The final clones were  
167 confirmed by PCR, RFLP and sequencing (data not shown). All viruses (EHV-1<sup>RFP+GFP</sup> and EHV-1<sup>RFP</sup>)  
168 were reconstituted as described before (Azab et al., 2013b).

169 **Cells.** Primary equine carotid artery endothelial cells (a kind gift from Prof. Dr. Johanna Plendl, Freie  
170 Universität Berlin, Institut für Veterinär-Anatomie) were propagated in Dulbecco's modified Eagle's  
171 medium (DMEM) (PAN-Biotech Ltd, Germany) supplemented with 20% fetal bovine serum (FBS) (PAN-  
172 Biotech Ltd, Germany), 1% nonessential amino acids (Biochrom, Germany), and 1% penicillin-  
173 streptomycin. Endothelial cells were obtained according to the rules of Institutional Animal Care and  
174 Committee of Berlin (Landesamt für Gesundheit und Soziales, L 0089/14). Equine PBMC were isolated  
175 from heparinized blood collected from healthy horses by density gradient centrifugation over Biocoll L  
176 6715 (Biochrom, Germany), following the manufacturer's instructions. After two washing steps, cells were  
177 resuspended in RPMI-1640 (Pan Biotech, Germany) supplemented with 10% FBS, 0.3 mg/ml glutamine,  
178 nonessential amino acids, and 1% penicillin-streptomycin. Blood collection was performed according to  
179 the rules of Institutional Animal Care and Committee of Berlin (Landesamt für Gesundheit und Soziales, L  
180 0294/13). PBMC were negative for both EHV-1 and EHV-4 as tested by qPCR (data not shown). PBMC  
181 were either used fresh after isolation or preserved in liquid-nitrogen and reconstituted when needed.

182 **Plasmids.** For assessing fusion assay by luciferase activity measurement, we used pT7EMCLuc plasmid,  
183 which expresses firefly luciferase reporter gene under the control of T7 promoter, and pCAGT7 plasmid,  
184 which expresses T7 RNA polymerase. Both plasmids were kindly provided by Dr. Richard Longnecker,  
185 Northwestern University. A plasmid expressing mRFP under the control of Human CMV promoter, pEP-  
186 CMVmRFP-in (Campbell et al., 2002; Tischer et al., 2006), was used for fusion assay. pEPmRFP1-in  
187 carrying kanamycin mRFP cassette had been used as a shuttle plasmid for EHV-1 strain Ab4-mRFP-  
188 VP26 construction.

189 **Antibodies.** FITC-labeled ConA (C7642), Triticum vulgaris (WGA; L4895) were from Sigma. Mouse anti-  
190 agrin antibody (D-2: sc-374117) and mouse anti-ezrin antibody (3C12: sc-58758) were from Santa Cruz  
191 Biotechnology. Rabbit anti-human Collagen I/II/III/IV/V was from (Biorad: 2150-2206). Mouse anti-EHV-4  
192 gD Mab was kindly provided by Jules Minke, Merial: 105E2K (Azab et al., 2013a). Mouse Anti-EHV-1 gD  
193 19-mer polyclonal antibodies (Allen and Yeargan, 1987) were kindly provided by Dr. Dennis O'Callaghan,  
194 Louisiana State University Health Sciences Center, Shreveport, LA. Mouse EHV-1 anti-gB monoclonal  
195 antibodies (mAb) (Wellington et al., 1996) were kindly provided by Dr. Udeni B. R. Balasuriya, Gluck  
196 equine research center, University of Kentucky, KY.



197 **Confocal microscopy and immunofluorescence.** For detection of the extracellular carbohydrate-rich  
198 matrix,  $2 \times 10^6$  PBMC (in suspension) were infected with EHV-1<sup>RFP</sup> or EHV-4<sup>GFP</sup> (MOI=0.5) for 5 min, 1 hr,  
199 24 hr, 2 days, 3 days, 5 days, and/or 7 days. Cells were centrifuged at 400 x g for 5 min and treated with  
200 ice cold citrate buffer (pH 3) for 1.5 min. The cells were washed three times with PBS and fixed with 4%  
201 Paraformaldehyde (PFA) for 20 min. For EHV-4, virus particles were stained with mouse anti-EHV-4 gD  
202 monoclonal antibody followed by Alexa Fluor 568-labeled goat anti-mouse IgG (1:1000; Invitrogen  
203 1841756). The carbohydrate-rich extracellular matrix was stained with FITC-labelled ConA and WGA  
204 (dilutions were 1:250 and 1:1000, respectively). Collagen, agrin and ezrin were stained by rabbit anti-  
205 human Collagen I/II/III/IV/V, mouse anti-agrin antibody, and mouse anti-ezrin antibody with dilutions of  
206 1:100, 1:50, and 1:50, respectively, followed by Alexa Fluor 488-labeled goat anti-rabbit (1:1000;  
207 Invitrogen: 1966932) and anti-mouse IgG (1:1000; Invitrogen: 2015565). Plasma membrane was stained  
208 with CellVue® Claret Far Red Fluorescent dye (Sigma-Aldrich). DAPI (Life Technologies) was used to  
209 stain the nucleus. Image stacks (number of stacks = 15-17 with 0.5-0.75  $\mu\text{m}$  z-stack step size) were  
210 photographed using VisiScope Confocal FRAP microscope ( $\times 40$  magnification) and equipped with  
211 ANDOR iXon Ultra 888 camera (Visitron Systems GmbH, Germany). The images were processed and  
212 analyzed by using Image J software (<https://imagej.nih.gov/ij/>) and Metamorph software 7.8 (Molecular  
213 Devices).

214 In another experiment,  $1 \times 10^6$  PBMC were infected with EHV-1<sup>RFP</sup> (MOI=0.5). All infected cells were  
215 treated with ice-cold citrate buffer and virus-neutralizing antibodies as described above. The cells were  
216 added to endothelial cell monolayers for 2 hr. The cells were fixed and stained with FITC-labeled ConA  
217 and WGA. Image acquisition, processing and analysis were performed as mentioned above.

218 **Flow chamber assay.** The assay was performed as previously described (Spiesschaert et al., 2015b).  
219 Briefly, PBMC ( $1 \times 10^6$ ) were infected with EHV-1<sup>GFP</sup> or EHV-4<sup>GFP</sup> (MOI=0.5) for different time points (5  
220 min, 1 hr, 6 hr). PBMC were treated with ice-cold citrate buffer (pH 3). The infected cells were washed two  
221 times and resuspended in medium containing 1:100 dilution of virus neutralizing antibody (titer: 1:2028 as  
222 determined by serum neutralization test (Azab et al., 2019)) at 37°C for 30 min (Goehring et al., 2011;  
223 Spiesschaert et al., 2015a). Endothelial cells were grown to confluency in 0.4 collagen IV-coated cell flow  
224 chambers (Ibidi Integrated BioDiagnostics) that were connected to a perfusion system by Luer locks (Ibidi  
225 Integrated BioDiagnostics). The flow chamber set was incubated at either 4°C or 37°C. Infected PBMC  
226 were introduced at a flow rate of 0.5 mm/s, which is within the mammalian physiological range (0.34 to  
227 3.15 mm/s) (Hudetz et al., 1996). The velocity was calculated according to the size of the chamber and  
228 the velocity in mammalian brain capillaries and was generated by a NE-4000 double-syringe pump (New  
229 Era Pump System). After 24 hr, GFP-viral plaques on the EC monolayer were counted (excluding the  
230 inlet/outlet areas) using an inverted fluorescence microscope and equipped with AxioCam MRc camera  
231 (Zeiss Axiovert 100).

232 To evaluate virus transfer from different PBMC subpopulations (i.e. T lymphocyte, B lymphocyte and  
233 monocytes) to EC, each PBMC subpopulation was sorted out and flow chamber assay was performed.  
234 Briefly, PBMC were stained with (1:200 diluted) primary mouse antibodies against equine CD3 (T  
235 lymphocyte), IgM (B lymphocyte) and CD14 (monocyte). The antibodies were kindly provided by Dr.  
236 Bettina Wagner, Cornell University, Ithaca, NY, USA. PBMC were then labelled with secondary Alexa  
237 Fluor 488-conjugated goat anti-mouse IgG antibody (Invitrogen) and sorted using FACSAria (BD  
238 Bioscience™). Sorted T- lymphocytes, B-lymphocytes and monocytes ( $1 \times 10^6$ ) were infected with EHV-  
239 1<sup>GFP</sup> (MOI=0.5) for 5 min at 37 °C. After incubation, cells were treated with citrate buffer, resuspended in  
240 EHV-1 neutralizing antibodies and flow chamber experiment was performed as described above.

241 **Contact assay.** PBMC ( $5 \times 10^5$ ) were infected with EHV-1<sup>GFP</sup> or EHV-4<sup>GFP</sup> at MOI of 0.1 at different time  
242 points (5min, 1 hr, and 6 hr). Infected cells were treated with ice-cold citrate buffer and added to EC for 2  
243 hr in the presence of virus neutralizing antibody as described above. Non-adherent cells were then  
244 removed by extensive and gentle washing with PBS. In the “no-contact” setup, virus-infected PBMC were  
245 placed into a transwell insert (with a membrane pore size of 0.4  $\mu\text{m}$ ; Corning Transwell support system)  
246 without direct contact with EC. Methylcellulose 1.5% was added and cells were incubated for 24 hr. Virus  
247 transfer was assessed by counting the green fluorescent viral plaques using an inverted fluorescence  
248 microscope (Zeiss Axiovert 100).

249 **Disruption of extracellular virus assemblies.** PBMC ( $5 \times 10^5$ ) were infected with EHV-1<sup>RFP+GFP</sup> or EHV-  
250 4<sup>GFP</sup> at MOI of 0.1 for 5 min as described above. The cells were subjected to vigorous pipetting, treated  
251 with heparin, or both. Heparin (50 $\mu$ g/ml; Sigma-Aldrich) was added to the cells for 30 min. PBMC (cells or  
252 supernatant) were added to EC for 2 hr. After washing, methylcellulose 1.5% was added to the cells. Viral  
253 plaques on EC were counted after 24 hr using an inverted fluorescence microscope. For confocal  
254 microscopy, EHV-1-infected PBMC were stained with FITC-labeled ConA and then treated with  
255 heparinase III (10 U ml<sup>-1</sup>) for 1 hr or heparin (50 $\mu$ g/ml) for 30 min at 37°C in serum-free medium. Image  
256 stacks were photographed using VisiScope Confocal FRAP microscope. Image acquisition, processing  
257 and analysis were performed as mentioned above.

258 **Fusion assays.** Luciferase assay. Day 1: PBMC were nucleofected with 2 $\mu$ g pCAGT7 plasmid using  
259 Amaxa® Cell Line Nucleofector® Kit V (Lonza) according to the manufacturer instructions. Day 2: PBMC  
260 were infected with EHV-1<sup>GFP</sup> at MOI of 1. Endothelial cells were nucleofected with 2 $\mu$ g pT7EMCLuc and  
261 seeded in collagen-coated 24 well plate. Day 3: Nucleofected-infected-PBMC were washed and overlaid  
262 on the nucleofected endothelial cells. Day 4: Activation of the reporter luciferase gene resulted from  
263 fusion of nucleofected infected PBMC to nucleofected endothelial cells was measured by Luciferase  
264 Assay System kit (E1500, Promega, USA) using TriStar LB 941 Multimodal plate reader (Berthold  
265 Technologies) for luminescence measurement according to the manufacturer's instructions (Promega).  
266 Briefly, endothelial cells were washed to remove non-fused PBMC and lysed with the lysis buffer. The  
267 lysed cells were left on a shaker for 15 min and 20  $\mu$ l of the cell lysates were used for the reading. As  
268 negative controls, only nucleofected PBMC or only infected PBMC were overlaid on the nucleofected  
269 endothelial. As a positive control, PBMC were nucleofected with both plasmids (pCAGT7 and  
270 pT7EMCLuc).

271 In another assay, PBMC were nucleofected with 2  $\mu$ g pEP-CMVmRFP-in as described above. After 24 hr,  
272 nucleofected PBMC were infected with EHV-1<sup>GFP</sup> at MOI of 1. After 24 hr, nucleofected-infected PBMC  
273 were added to endothelial cells for 3.5 hr. Endothelial cells were washed and fixed with 4% PFA and  
274 analyzed using VisiScope Confocal FRAP microscope ( $\times 40$  magnification). Images were pseudocolored  
275 according to their respective emission wavelengths, overlaid and processed using Image J and  
276 Metamorph softwares.

277 To determine the expression of fusogenic viral glycoproteins (gB and gD) on the surface of infected PBMC,  
278 cells were infected with EHV-1<sup>RFP</sup> (MOI=0.5) for 24 hr. Infected cells were fixed with 4% PFA for 20 min  
279 and stained with primary mouse antibody against EHV-1 gB and gD (dilution of 1:250) for 1 hr. Goat anti-  
280 mouse Alexa Fluor-488 was used as secondary antibody and nucleus was stained with DAPI. Cells were  
281 imaged using VisiScope Confocal FRAP microscope as described above.

282 **Live cell imaging.** PBMC were infected with EHV-1<sup>RFP+GFP</sup> (MOI=3) for 5 min then the cells were treated  
283 with ice-cold citrate buffer and virus neutralizing antibody. The infected cells were added to endothelial  
284 cells grown on 8-wells ibidi slide coated with collagen (Ibidi Integrated BioDiagnostics). Cells were imaged  
285 in non-phenol red DMEM cell culture media (Pan Biotech, Germany) supplemented with 20% FBS,  
286 1% penicillin and streptomycin, and 1% non-essential amino acid. The temperature on the microscope  
287 stage was held stable during time-lapse sessions using an electronic temperature-controlled airstream  
288 incubator. The field area was chosen displaying EHV-1<sup>RFP+GFP</sup> viral particles (red signals) on the surface  
289 of PBMC overlaying the EC. Images were captured in time-lapse every 8 min time series using a  
290 VisiScope Confocal FRAP microscope ( $\times 20$  magnification). Images and movies were generated and  
291 analyzed using ImageJ and Metamorph softwares. Long time-lapse experiments were carried out using  
292 the autofocus function integrated into the advanced time series macro set.

293 **Correlative fluorescent and electron microscopy.** For TEM analysis, endothelial cells were grown on  
294 correlative microscopy gridded coverslips (LCMC34A, Plano GmbH, Germany). PBMC were infected with  
295 EHV-1<sup>RFP</sup> (MOI=5) for 5 min then the cells were treated with ice-cold citrate buffer and virus neutralizing  
296 antibody. The infected-PBMC were overlaid on EC and incubated at 37°C for 1 or 3 hr. Cells were fixed  
297 with 4% PFA for 30 min at room temperature. Cell nuclei were counter-stained with 2 $\mu$ g/ml Hoechst  
298 33342 (Thermo Fisher Scientific, Germany) in PBS for 10 min at room temperature and kept in PBS after  
299 staining. Cells covering the region of one grid square on the coverslip were imaged using a  
300 CellDiscoverer 7 microscope (Carl Zeiss, Germany) at 20x magnification. For TEM, cells were then fixed  
301 on the coverslips in 2.5% glutaraldehyde (Grade I, Sigma, Germany) freshly prepared in PBS from a 25%

302 stock solution (overnight at 4°C). After washing 3 times in PBS, coverslips were incubated in 0.5 % (v/v)  
303 osmium tetroxide (Science Services GmbH, Germany) in PBS for 1 hr at room temperature, washed 4  
304 times for 20 min in distilled water, incubated for 30 min in 100 mM Hepes buffer containing 0.1 % (w/v)  
305 tannic acid (Science Services, Germany), washed 3 times for 10 min in distilled water and then again  
306 incubated in 2 % (w/v) uranyl acetate (Sigma-Aldrich, Merck, Germany) for 1.5 hr at room temperature.  
307 After washing once in distilled water, samples were then dehydrated through a series of increasing  
308 ethanol concentrations (5 min in 30 %, 10 min in 50 %, 15 min each in 70%, 90%, 96% and finally 3 times  
309 10 min in absolute ethanol, respectively). Samples were then incubated overnight at 4°C in 100 %  
310 SPURR resin (Low Viscosity Spurr Kit, Ted Pella, CA, USA). After exchanging fresh SPURR resin 2 times  
311 (2 hr at room temperature), coverslips were mounted between two pieces of Aclar Embedding Film  
312 (Science Services, Germany) for polymerization (24 hr at 60°C). For TEM imaging, areas (comprising  
313 approximately 3x3 squares from the grid pattern) exhibiting 2-4 PBMC carrying a virus load closely  
314 attached to EC were cut out, mounted on a preformed resin dummy and embedded again in SUPRR  
315 resin in order to cut target cells with an orientation perpendicular to coverslip support. After  
316 polymerization, sample blocks were carefully trimmed close to the selected cells using a EM Trim2  
317 specimen trimmer (Leica Microsystems, Germany) followed by cutting 70 nm sections using a UC7 ultra-  
318 microtome (Leica Microsystems, Germany) equipped with a 3 mm diamond knife (Diatome, Biel,  
319 Switzerland). Sections were placed on 3.05 mm carbon-coated Formvar copper slot grids (Plano GmbH,  
320 Germany) and post-contrasted using 2% (w/v) uranyl acetate and Reynolds lead citrate. TEM images  
321 were taken at 1100x - 6500x nominal magnification using a Tecnai Spirit transmission electron  
322 microscope (FEI) operated at 120 kV and equipped with a 4k x 4k F416 CMOS camera (Tietz Video and  
323 Image Processing Systems GmbH; TVIPS).

324 **Statistical analyses.** Statistics were performed using SPSS 23 and GraphPad Prism 7. Normally  
325 distributed data sets, determined by the Shapiro-Wilk test, were analyzed with one-way analysis of  
326 variance (ANOVA) followed by Dunnett's test for multiple comparisons. Data sets that were not normally  
327 distributed were analyzed with Kruskal-Wallis test followed by Dunns test for multiple comparison tests.  
328 \*, P < 0.05, \*\*, P < 0.01, \*\*\*, P < 0.001.

329

330 **Supplemental References**

- 331 Allen, G.P., and Yeargan, M.R. (1987). Use of lambda gt11 and monoclonal antibodies to map the genes  
332 for the six major glycoproteins of equine herpesvirus 1. *J Virol* *61*, 2454-2461.
- 333 Azab, W., Bedair, S., Abdelgawad, A., Eschke, K., Farag, G.K., Abdel-Raheim, A., Greenwood, A.D.,  
334 Osterrieder, N., and Ali, A.A.H. (2019). Detection of equid herpesviruses among different Arabian horse  
335 populations in Egypt. *Vet Med Sci*.
- 336 Azab, W., Kato, K., Arai, J., Tsujimura, K., Yamane, D., Tohya, Y., Matsumura, T., and Akashi, H. (2009).  
337 Cloning of the genome of equine herpesvirus 4 strain TH20p as an infectious bacterial artificial  
338 chromosome. *Archives of virology* *154*, 833-842.
- 339 Azab, W., Lehmann, M.J., and Osterrieder, N. (2013a). Glycoprotein H and alpha4beta1 Integrins  
340 Determine the Entry Pathway of Alphaherpesviruses. *J Virol* *87*, 5937-5948.
- 341 Azab, W., Lehmann, M.J., and Osterrieder, N. (2013b). Glycoprotein H and  $\alpha\beta 1$  integrins determine the  
342 entry pathway of alphaherpesviruses. *Journal of virology* *87*, 5937-5948.
- 343 Azab, W., and Osterrieder, N. (2012). Glycoproteins D of equine herpesvirus type 1 (EHV-1) and EHV-4  
344 determine cellular tropism independently of integrins. *Journal of virology* *86*, 2031-2044.
- 345 Campbell, R.E., Tour, O., Palmer, A.E., Steinbach, P.A., Baird, G.S., Zacharias, D.A., and Tsien, R.Y.  
346 (2002). A monomeric red fluorescent protein. *Proceedings of the National Academy of Sciences* *99*,  
347 7877-7882.
- 348 Goehring, L., Hussey, G.S., Ashton, L., Schenkel, A., and Lunn, D. (2011). Infection of central nervous  
349 system endothelial cells by cell-associated EHV-1. *Veterinary microbiology* *148*, 389-395.
- 350 Goodman, L.B., Loregian, A., Perkins, G.A., Nugent, J., Buckles, E.L., Mercorelli, B., Kydd, J.H., Palù, G.,  
351 Smith, K.C., and Osterrieder, N. (2007). A point mutation in a herpesvirus polymerase determines  
352 neuropathogenicity. *PLoS pathogens* *3*, e160.
- 353 Hudetz, A.G., Fehér, G., and Kampine, J.P. (1996). Heterogeneous autoregulation of cerebrocortical  
354 capillary flow: evidence for functional thoroughfare channels? *Microvascular research* *51*, 131-136.
- 355 Spiesschaert, B., Goldenbogen, B., Taferner, S., Schade, M., Mahmoud, M., Klipp, E., Osterrieder, N.,  
356 and Azab, W. (2015a). Role of gB and pUS3 in equine herpesvirus 1 transfer between peripheral blood  
357 mononuclear cells and endothelial cells: a dynamic in vitro model. *Journal of virology* *89*, 11899-11908.
- 358 Spiesschaert, B., Osterrieder, N., and Azab, W. (2015b). Comparative analysis of glycoprotein B (gB) of  
359 equine herpesvirus type 1 and type 4 (EHV-1 and EHV-4) in cellular tropism and cell-to-cell transmission.  
360 *Viruses* *7*, 522-542.
- 361 Tischer, B., von Einem, J., Kaufer, B., and Osterrieder, N. (2006). Two-step red-mediated recombination  
362 for versatile high-efficiency markerless DNA manipulation in *Escherichia coli*. *BioTechniques* *40*, 191-197.
- 363 Wellington, J.E., Gooley, A.A., Love, D.N., and Whalley, J.M. (1996). N-terminal sequence analysis of  
364 equine herpesvirus 1 glycoproteins D and B and evidence for internal cleavage of the gene 71 product. *J*  
365 *Gen Virol* *77* ( Pt 1), 75-82.

366
